# Supplementary material
Source: MDPI journal article supplement (https://www.mdpi.com/1999-4907/15/1/169)
Supplement: s1 [file s1]

**Supplementary Table S1.** The primers for qRT-PCR.

| Primer name | Primer sequence (5'→3')  |
|-------------|--------------------------|
| PtrActin.F  | TGTTGCCCTTGACTATGAGCAGGA |
| PtrActin.R  | ACGGAATCTCTCAGCTCCAATGGT |
| PtrHECT1.F  | TGAGCAGCATCTTTCTAACCT    |
| PtrHECT1.R  | GGGTCACACCCATTTTGTGC     |
| PtrHECT2.F  | TGCCTCCTCGCATTTCATTGT    |
| PtrHECT2.R  | GGTTCCTGTCAGCAAACTG      |
| PtrHECT3.F  | AGCCAGGAGATGAACTGTTGAT   |
| PtrHECT3.R  | GTTCTCTTCGCCCACAAAGC     |
| PtrHECT4.F  | TTGTGGAACTTTGCCCTGGT     |
| PtrHECT4.R  | CAAGATCTTCAAGCTCCAAGCT   |
| PtrHECT5.F  | CGAGGAGGAACTTGAGCGTT     |
| PtrHECT5.R  | CTCCTGTAGGTAGCCGAGGT     |
| PtrHECT6.F  | GAGGGAGAAAGGCAGTGGAG     |
| PtrHECT6.R  | ATCCCCACCAGCAAATAGGC     |
| PtrHECT7.F  | CAGAGAGTTGTGGGAGCCTG     |
| PtrHECT7.R  | GGGTTTAGGACAGCCAGACC     |
| PtrHECT8.F  | TCATGAGGGGCTTTCAGCAG     |
| PtrHECT8.R  | TCGCTATGATAACCACCCGC     |
| PtrHECT9.F  | CCTTGAGAGTGGTGGGGAAC     |
| PtrHECT9.R  | CCAGGAGGAAGAGGGGATGA     |
| PtrHECT10.F | AGACGACACCGAATCATCCAC    |
| PtrHECT10.R | GATTGAGACCGACGGAGAGG     |
| PtrHECT11.F | TTTGATGGGGAGTGTGGTGG     |
| PtrHECT11.R | GCCAACTTGTTTCAGAGGCAT    |
| PtrHECT12.F | GACGTCGCACGTCTTATCCA     |
| PtrHECT12.R | GAGCTTGAGCAGCTGATTCT     |
| PtrHECT13.F | ACACCATCTCGCAAGCATCA     |
| PtrHECT13.R | TGAAGCGTCTCCAAACCCTC     |

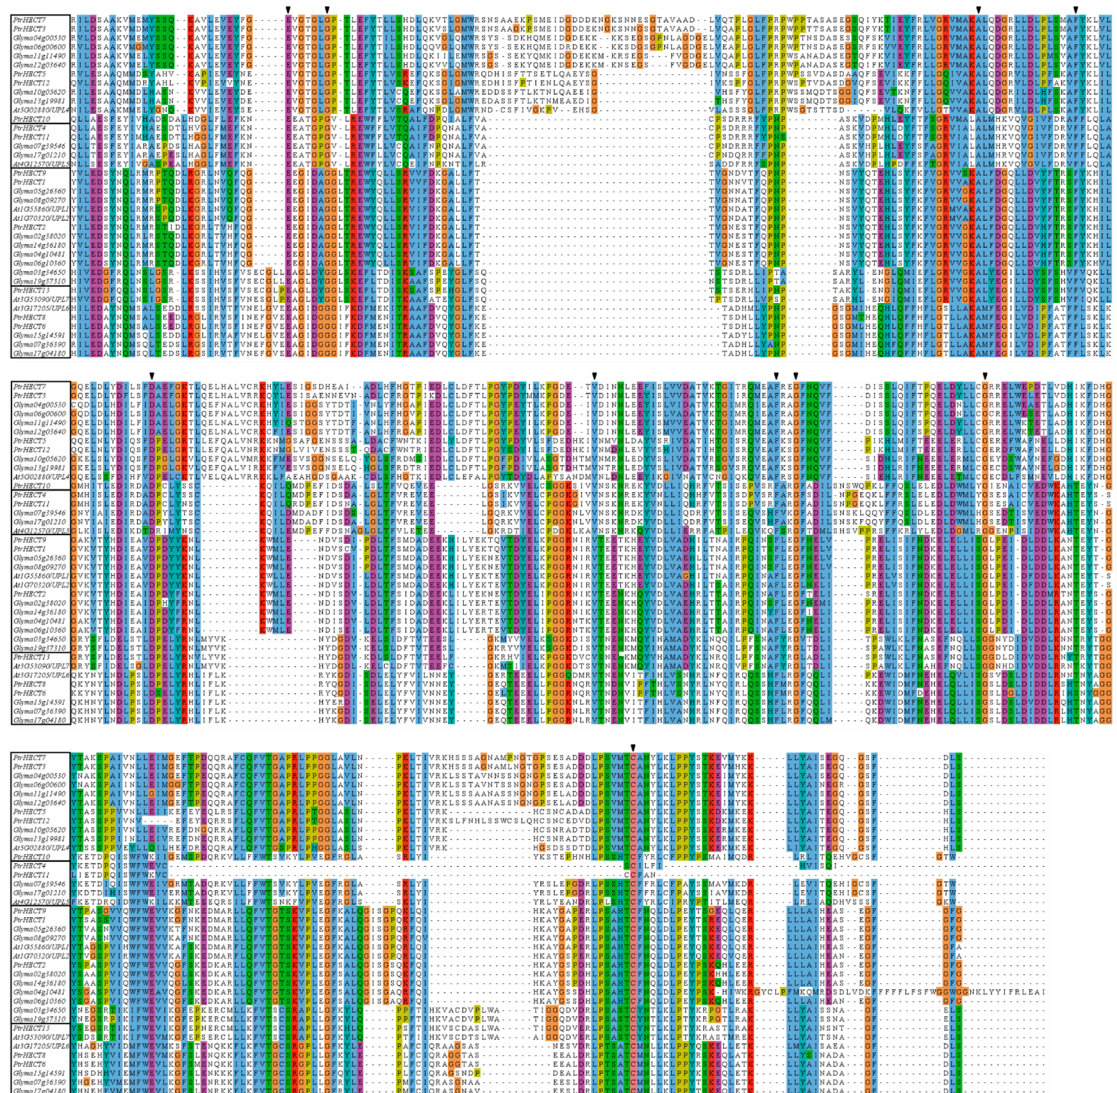

**Supplementary Figure S1.** Sequence alignment of the HECT domain of all the identified HECT proteins in *Populus trichocarpa*, *Arabidopsis thaliana*, *Glycine max*, *Oryza sativa*, *Zea mays* and *Triticum aestivum*. The HECT conserved domain (PF00632) of all the putative HECT proteins were analyzed to identify the conserved active site residues. The triangle indicates the conserved active site cysteine residue.

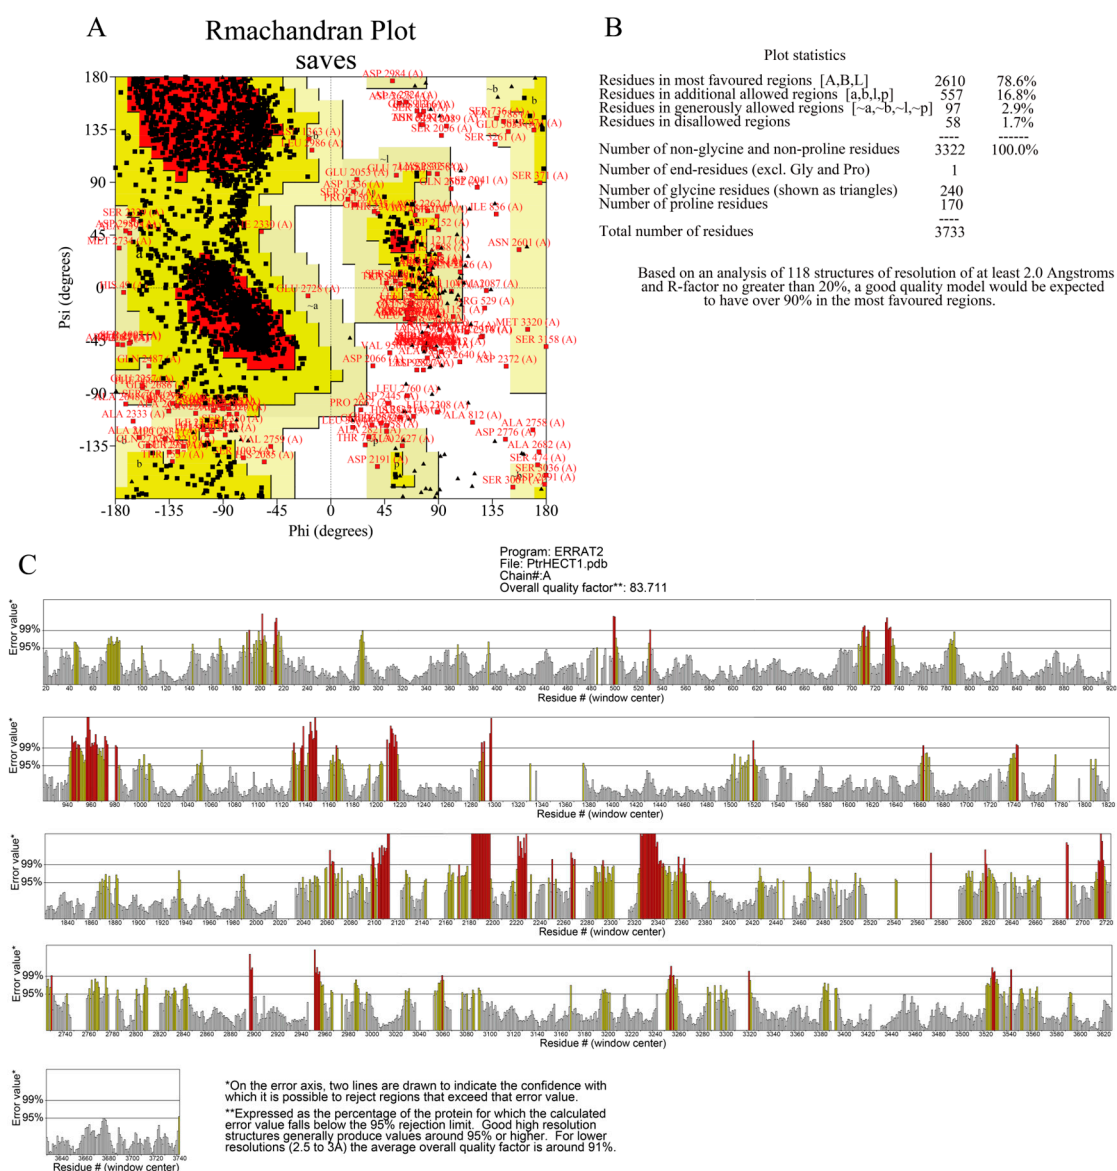

**Supplementary Figure S2.** Homology modelled structure validation of PtrHECT1 using (A) Ramachandran plot; (B) Ramachandran plot statistics; and (C) ERRAT.

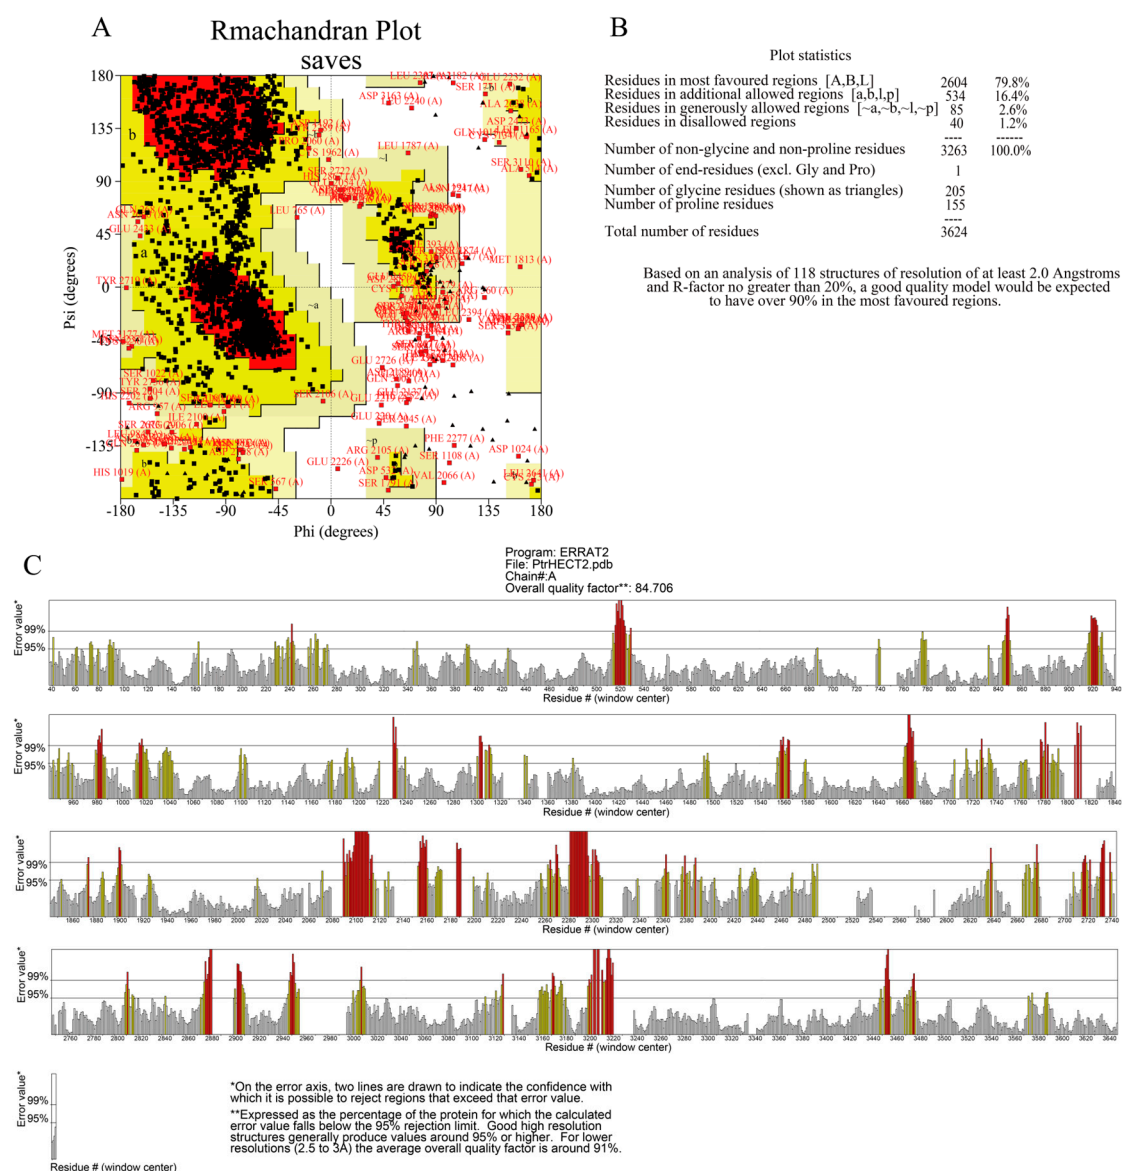

**Supplementary Figure S3.** Homology modelled structure validation of PtrHECT2 using (A) Ramachandran plot; (B) Ramachandran plot statistics; and (C) ERRAT.



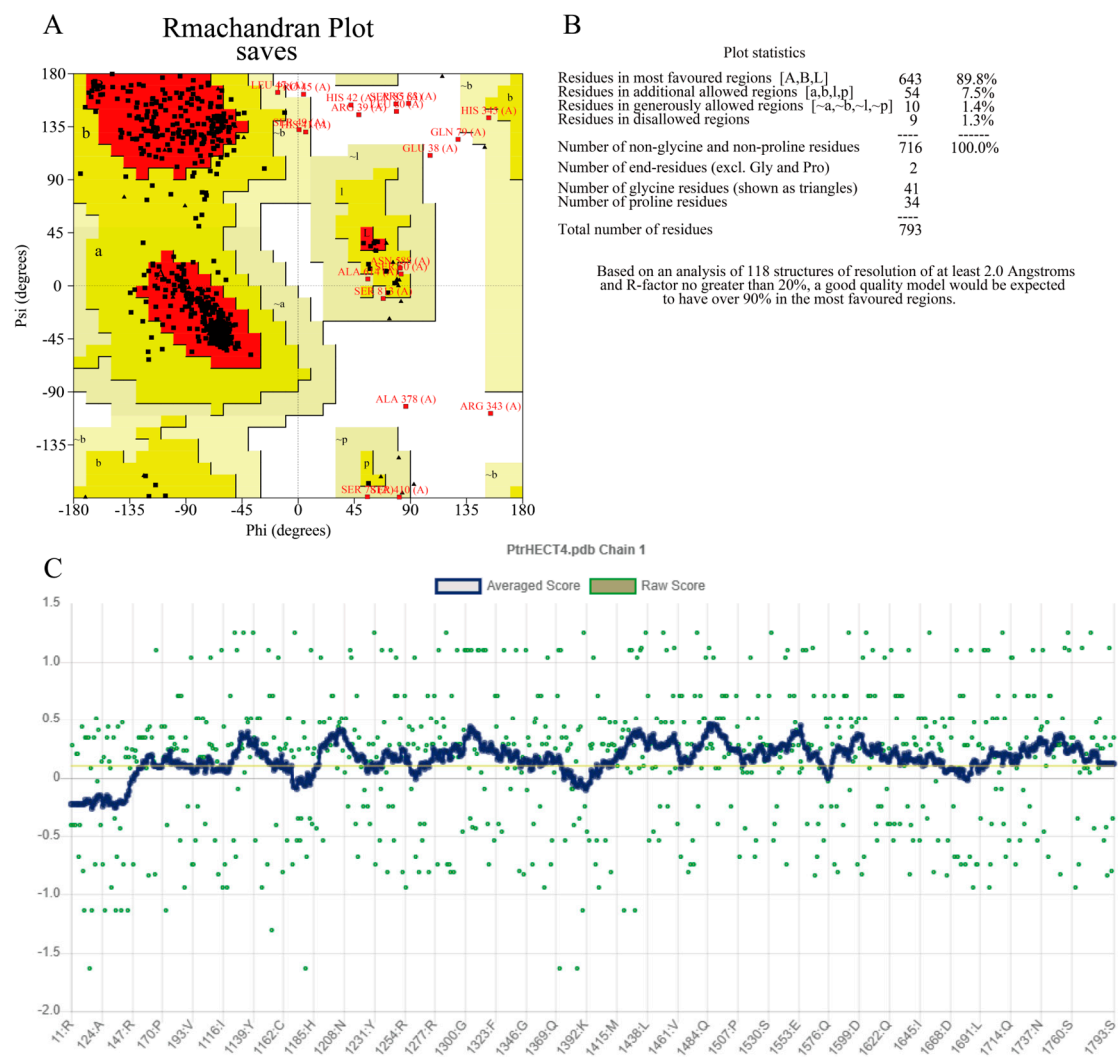

**Supplementary Figure S5.** Homology modelled structure validation of PtrHECT4 using (A) Ramachandran plot; (B) Ramachandran plot statistics; and (C) Verify3D.

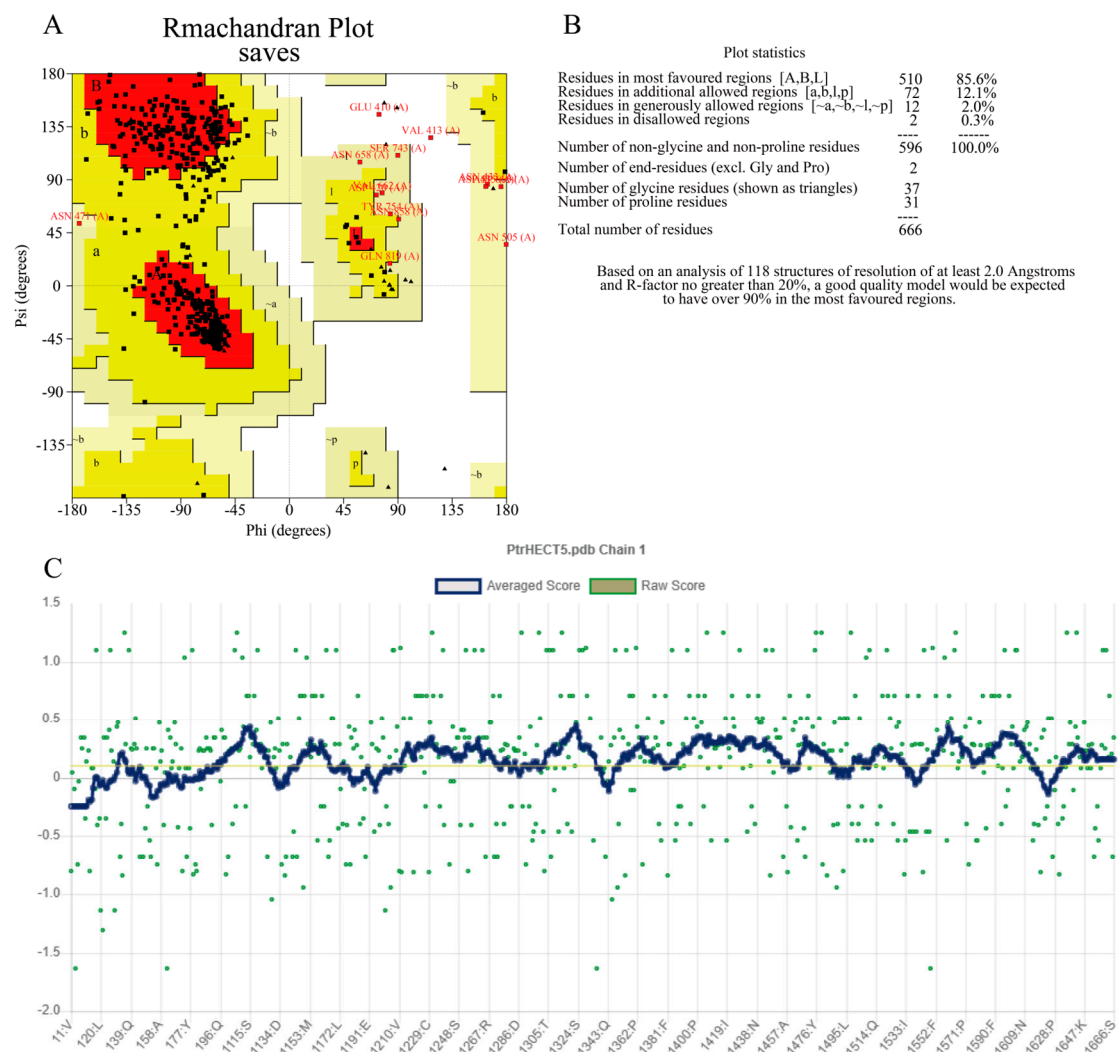

**Supplementary Figure S6.** Homology modelled structure validation of PtrHECT5 using (A) Ramachandran plot; (B) Ramachandran plot statistics; and (C) Verify3D.

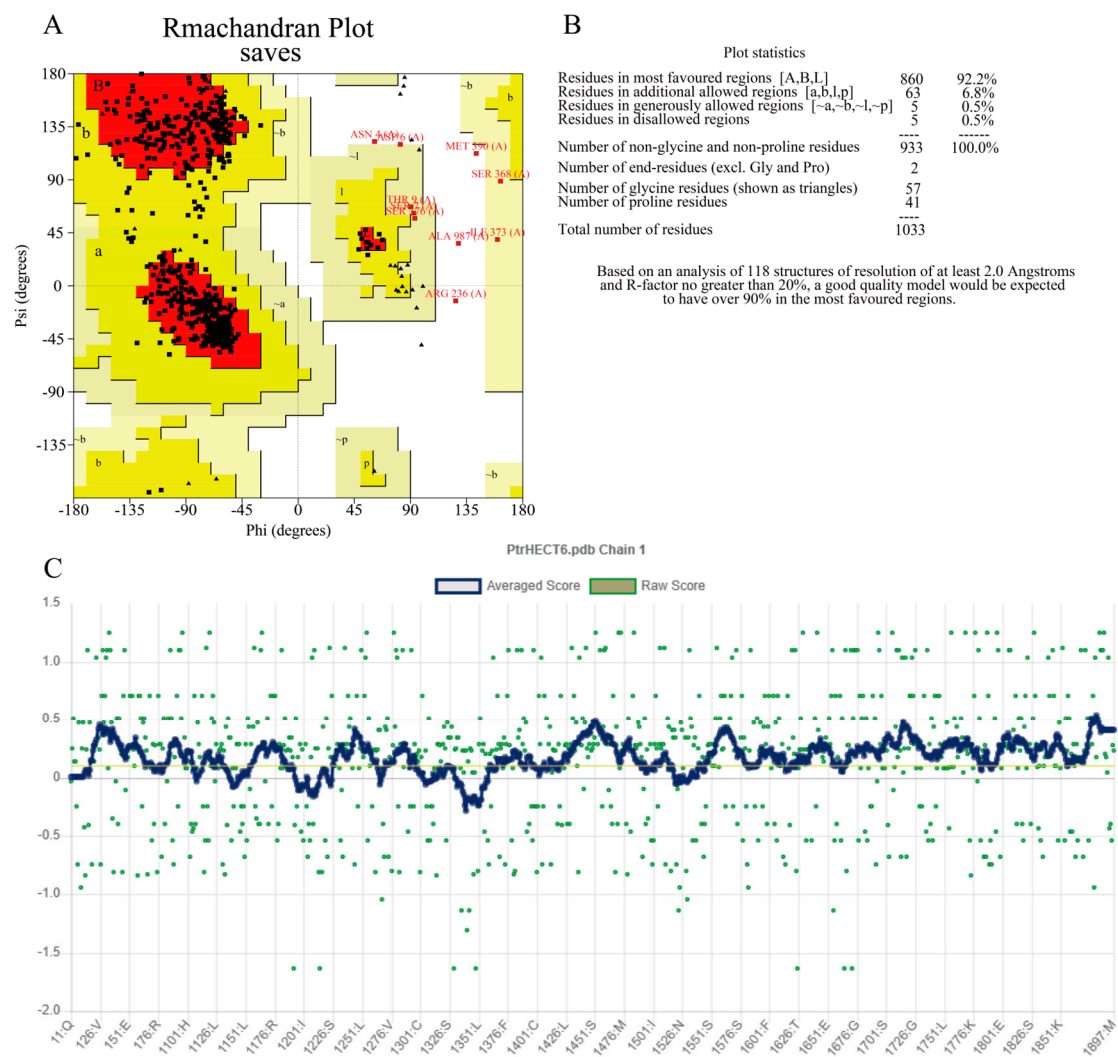

**Supplementary Figure S7.** Homology modelled structure validation of PtrHECT6 using (A) Ramachandran plot; (B) Ramachandran plot statistics; and (C) Verify3D.



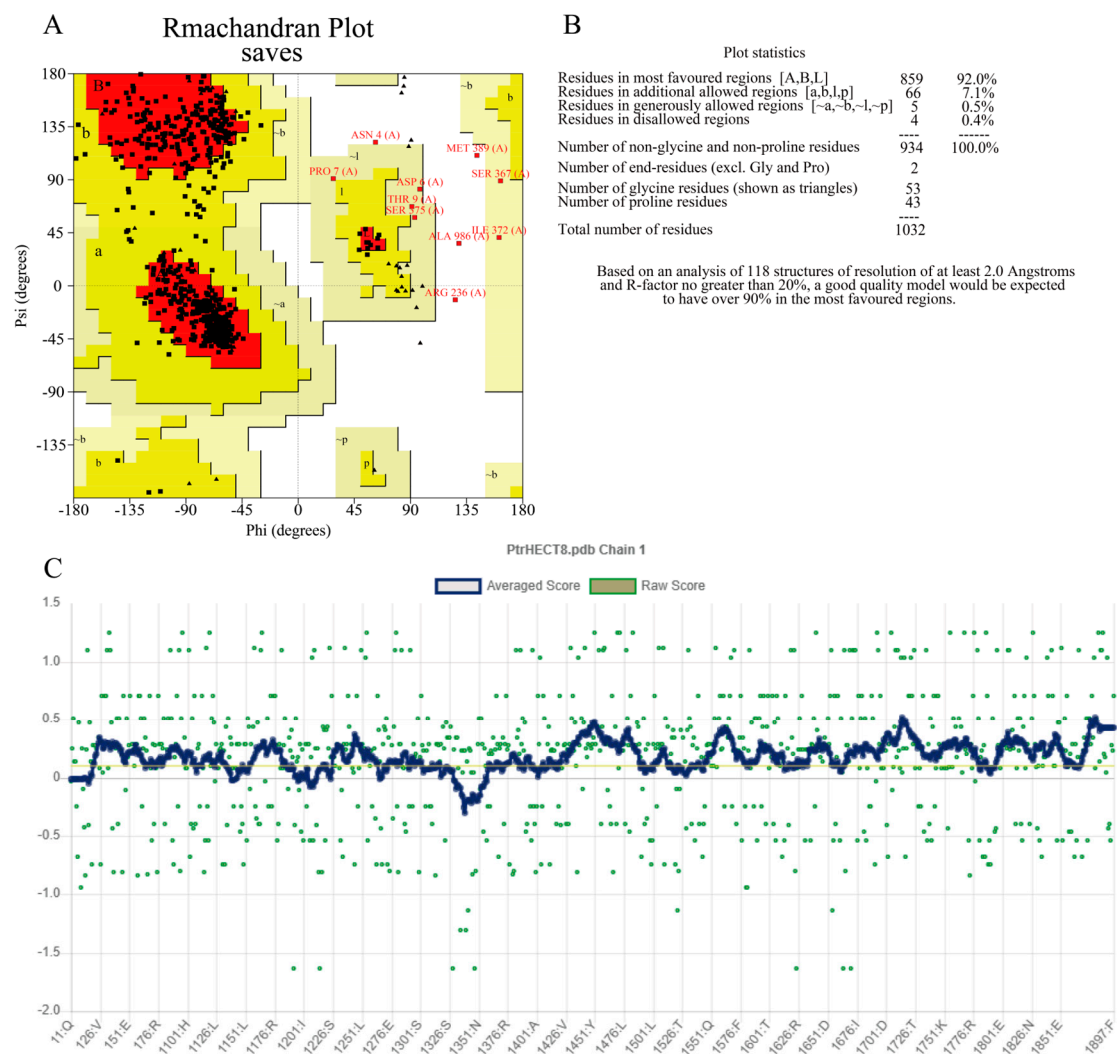

**Supplementary Figure S9.** Homology modelled structure validation of PtrHECT8 using (A) Ramachandran plot; (B) Ramachandran plot statistics; and (C) Verify3D.

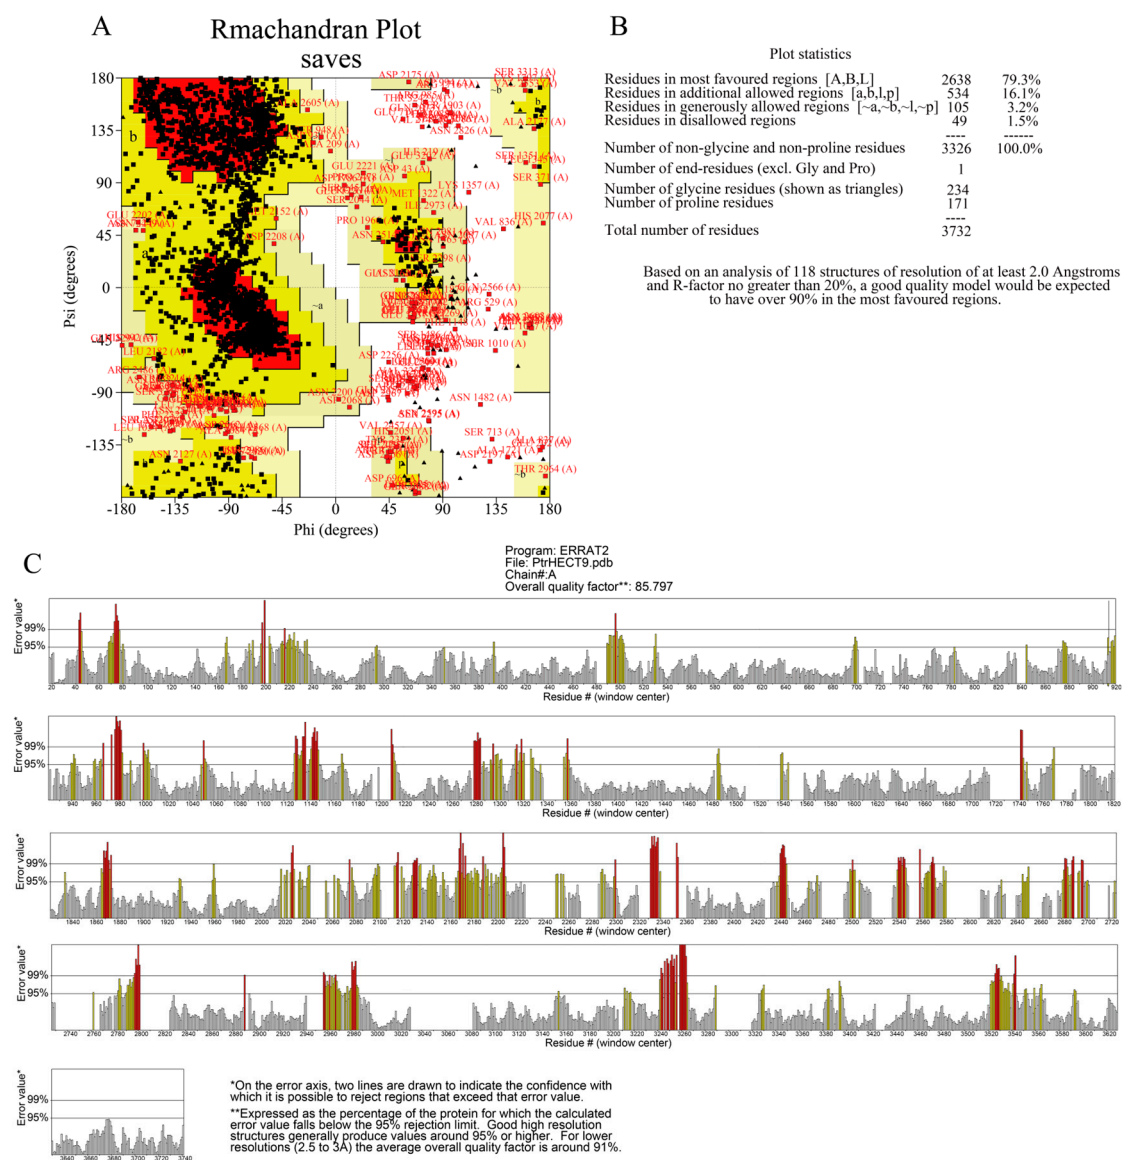

**Supplementary Figure S10.** Homology modelled structure validation of PtrHECT9 using (A) Ramachandran plot; (B) Ramachandran plot statistics; and (C) ERRAT.

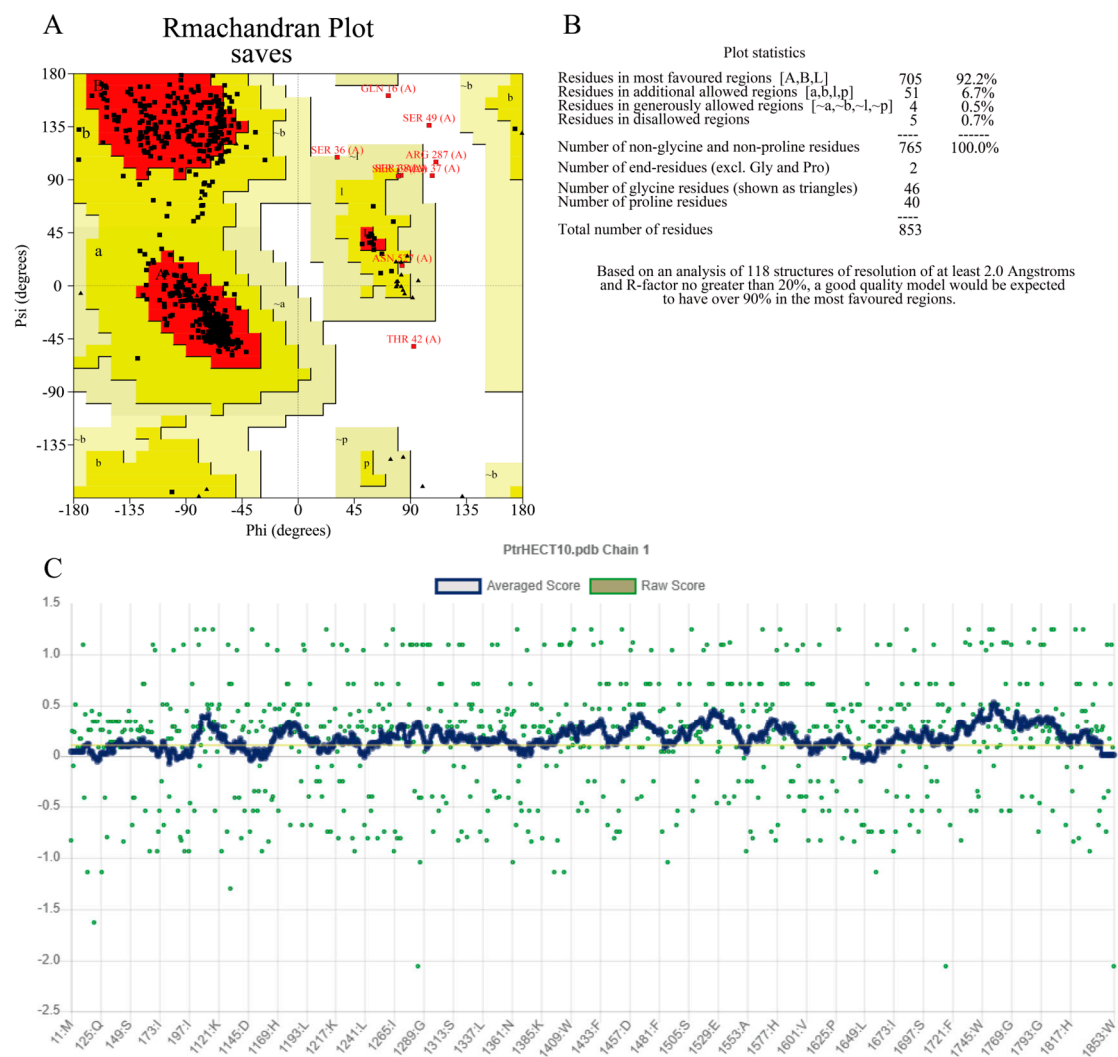

**Supplementary Figure S11.** Homology modelled structure validation of PtrHECT10 using (A) Ramachandran plot; (B) Ramachandran plot statistics; and (C) Verify3D.

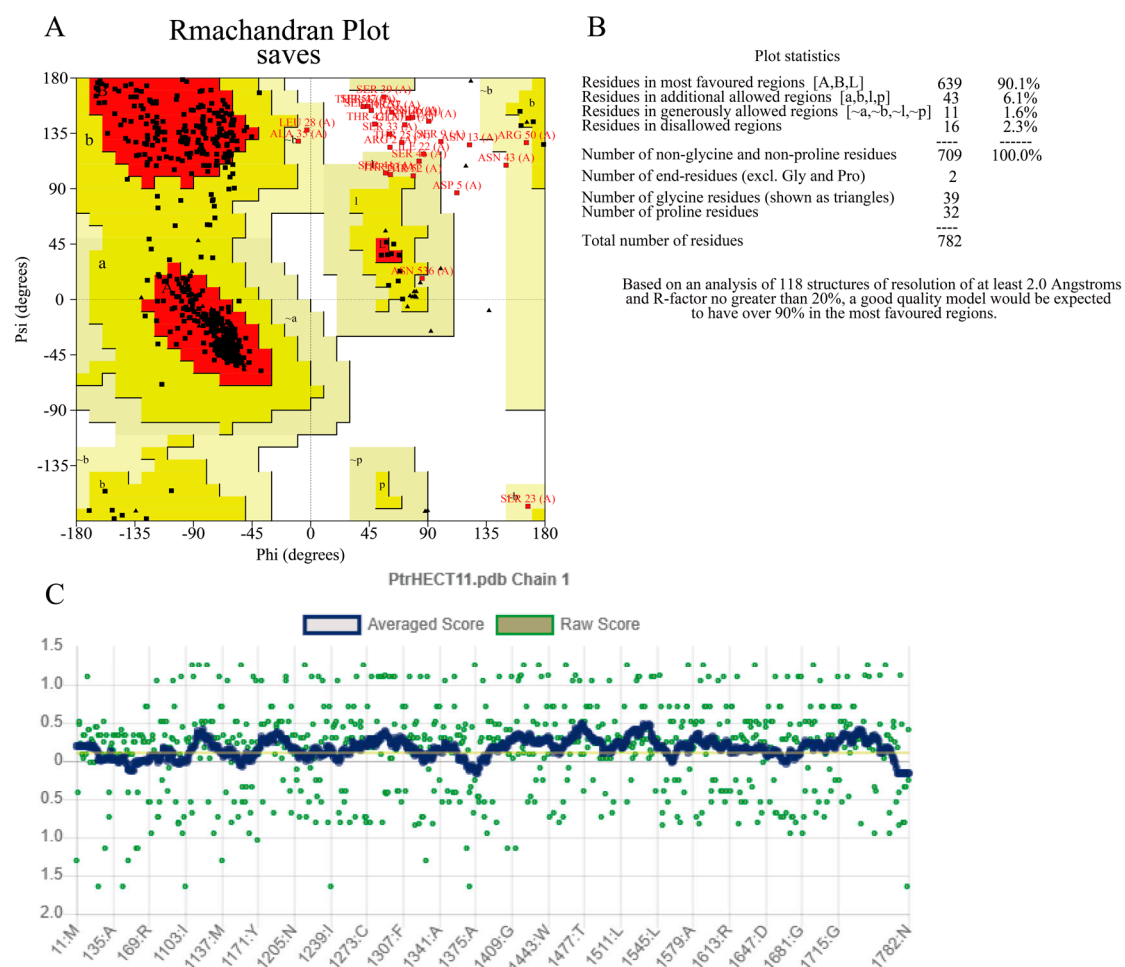

**Supplementary Figure S12.** Homology modelled structure validation of PtrHECT11 using (A) Ramachandran plot; (B) Ramachandran plot statistics; and (C) Verify3D.

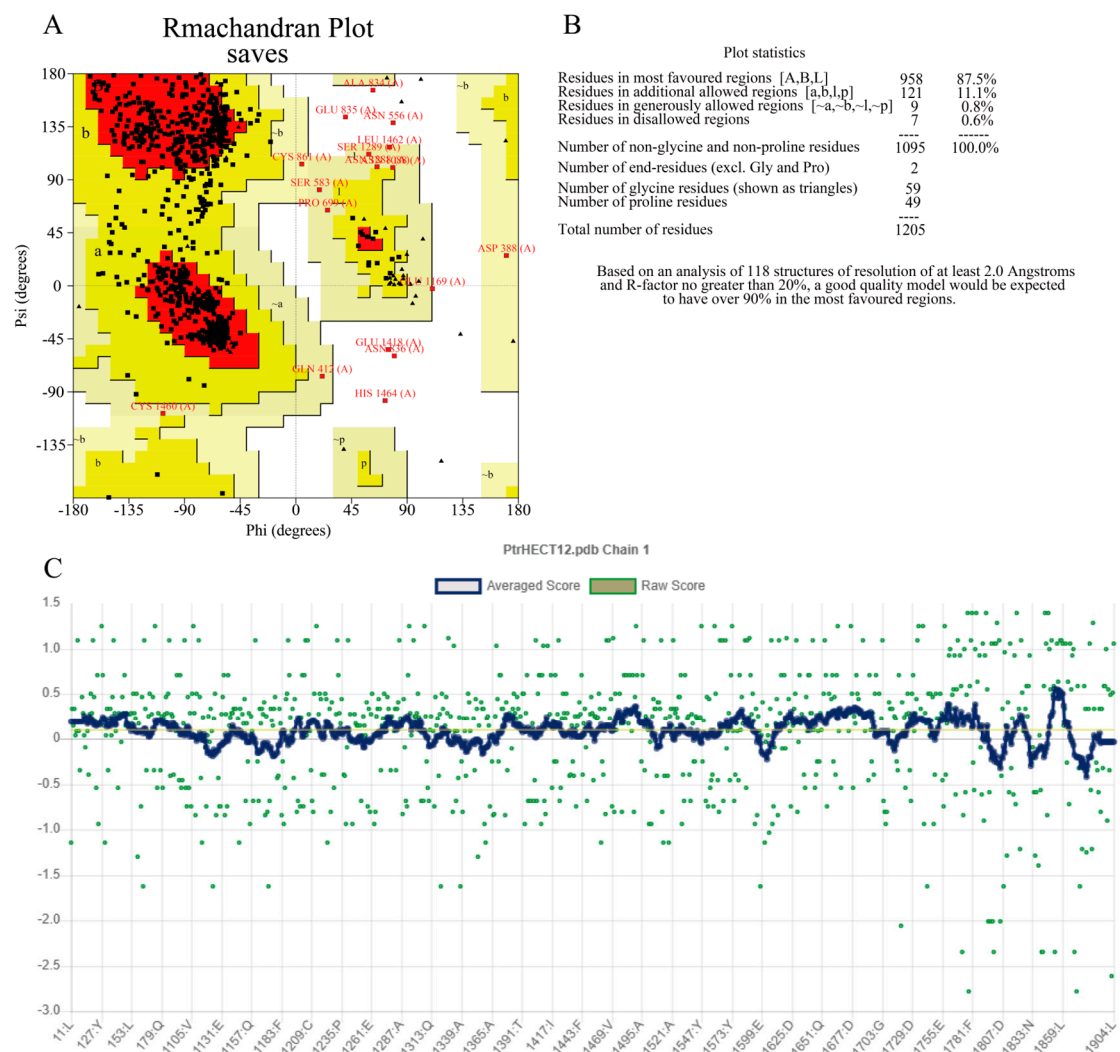

**Supplementary Figure S13.** Homology modelled structure validation of PtrHECT12 using (A) Ramachandran plot; (B) Ramachandran plot statistics; and (C) Verify3D.

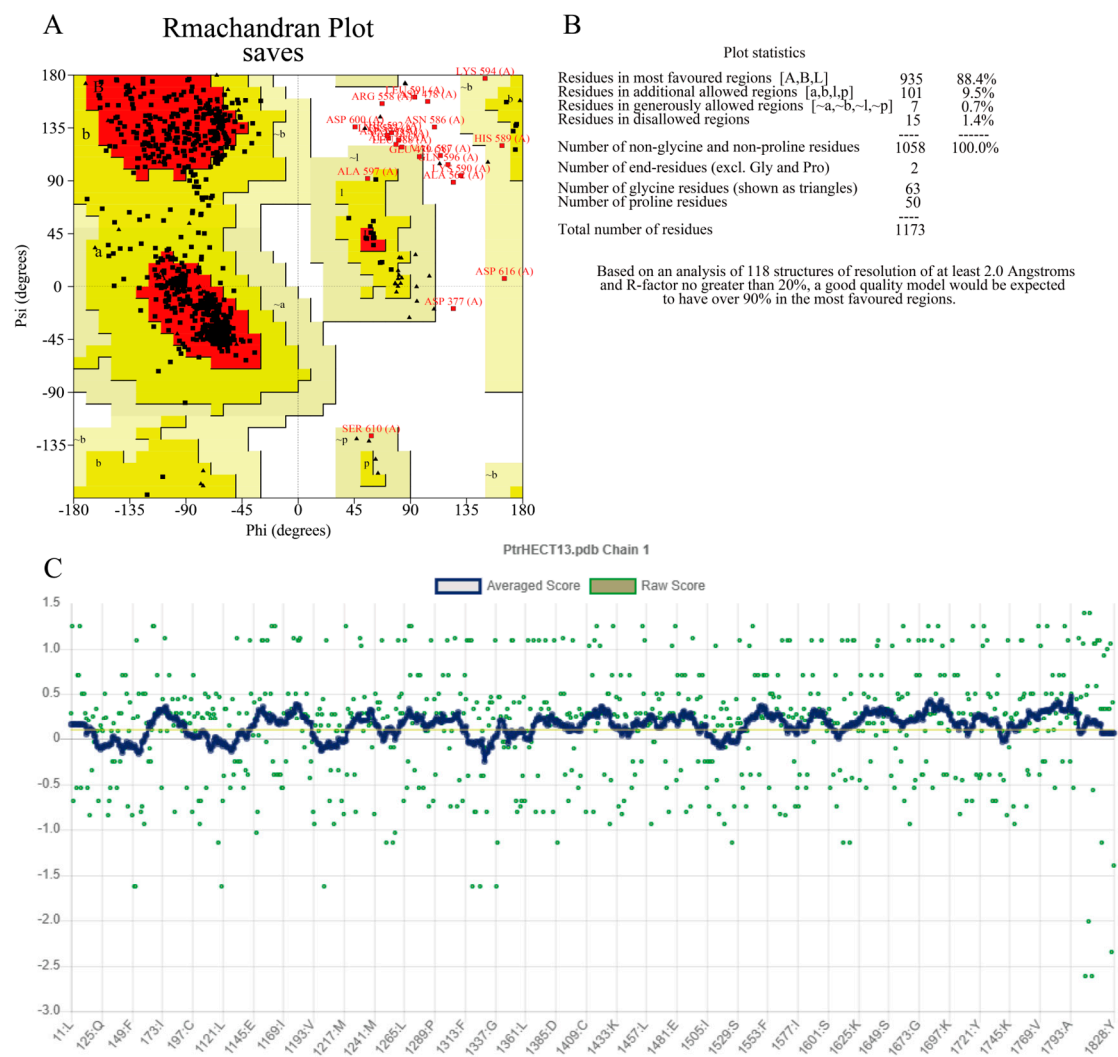

**Supplementary Figure S14.** Homology modelled structure validation of PtrHECT13 using (A) Ramachandran plot; (B) Ramachandran plot statistics; and (C) Verify3D.
